# Supplementary material for: Changing the glucose cut-off values that define hypoglycaemia has a major effect on reported frequencies of hypoglycaemia
Source: Springer Nature journal article supplement (doi:10.1007/s00125-008-1147-0), 2008-09-19

**Electronic supplementary material**

**ESM Fig. 1** Event rates per 100 patient days of non-severe hypoglycaemia for a range of predefined glucose cut-off points for the definition of hypoglycaemia, plotted against endpoint HbA<sub>1c</sub> categories

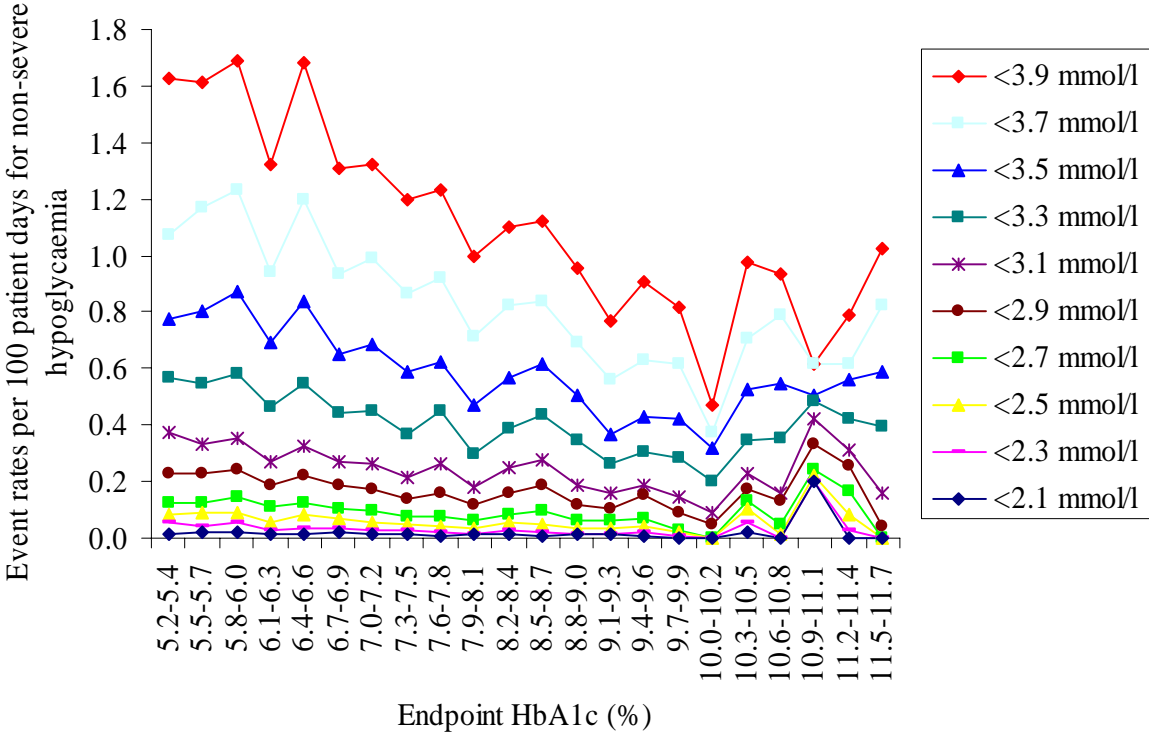

Supplement: MOESM1 [file 8087942]
