# Supplementary material for: Changing the glucose cut-off values that define hypoglycaemia has a major effect on reported frequencies of hypoglycaemia
Source: Springer Nature journal article supplement (doi:10.1007/s00125-008-1147-0), 2008-09-19
Supplement: MOESM2 [file 8087942]

## Electronic supplementary material

**ESM Table 1** Clinical characteristics of the analysis population

|                                         | GOAL A1C study<br>( <i>n</i> =5,549) | GOT study<br>( <i>n</i> =4,417) | Combined analysis population<br>( <i>n</i> =9,966) |
|-----------------------------------------|--------------------------------------|---------------------------------|----------------------------------------------------|
| Sex (% female)                          | 48.9                                 | 51.4                            | 50.0                                               |
| Age (years)                             | 56.9±11.5                            | 55.9±11.4                       | 56.4±11.5                                          |
| BMI (kg/m <sup>2</sup> )                | 34.4±7.8                             | 34.8±7.6                        | 34.5±7.7                                           |
| Duration of diabetes (years)            | 8.6±6.4                              | 8.3±6.3                         | 8.5±6.4                                            |
| Baseline HbA <sub>1c</sub> (%)          | 8.9±1.5                              | 9.2±1.6                         | 9.0±1.6                                            |
| Week 12 HbA <sub>1c</sub> (%)           | 7.7±1.0                              | 7.7±1.1                         | 7.7±1.1                                            |
| Endpoint HbA <sub>1c</sub> (%)          | 7.4±1.0                              | 7.4±1.0                         | 7.4±1.0                                            |
| Baseline fasting blood glucose (mmol/l) | 10.0±3.0                             | 9.9±3.1                         | 9.9±3.1                                            |
| Week 12 fasting blood glucose (mmol/l)  | 6.4±1.9                              | 5.9±2.2                         | 6.2±2.1                                            |
| Endpoint fasting blood glucose (mmol/l) | 5.9±1.8                              | 5.6±2.1                         | 5.8±1.9                                            |
| Endpoint daily insulin dose (U)         | 53.5±35.7                            | 71.4±40.4                       | 61.1±38.9                                          |

Data are mean±SD
